# Supplementary material for: BNnanotubes coated with uniformly distributed Fe3O4nanoparticles: novel magneto-operable nanocomposites
Source: Royal Society of Chemistry journal article supplement (doi:10.1039/b916971g), 2009-12-11
Supplement: b916971g.pdf [file b916971g.pdf]

## Supporting Information

### BN Nanotube Coated with Uniformly-Sized/Placed $\text{Fe}_3\text{O}_4$ Nanoparticles: Novel Magneto-Operable Nanocomposites

Yang Huang\*, Jing Lin, Yoshio Bando, Chengchun Tang, Chunyi Zhi, Youguo Shi, Eiji Takayama-Muromachi and Dmitri Golberg

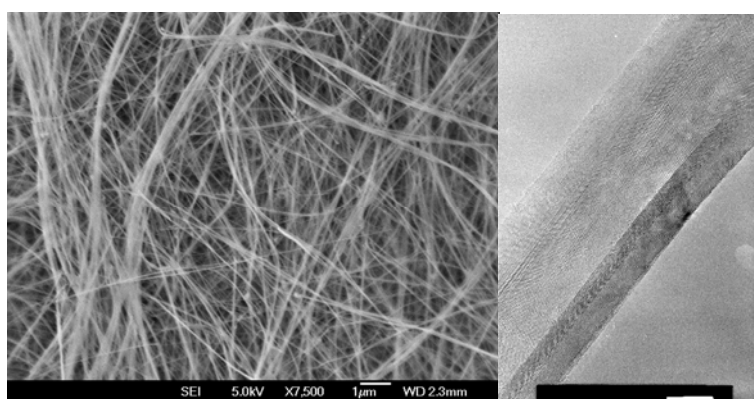

Figure S1. SEM image of the as-prepared BNNTs of high purity. TEM image showing the smooth surface and perfect crystallization of a representative BNNT.

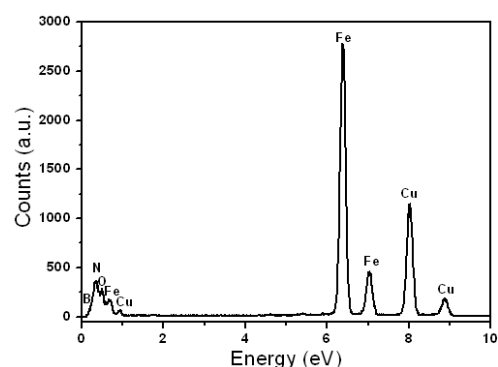

Figure S2. EDS of the  $\text{Fe}_3\text{O}_4/\text{BNNT}$  nanocomposites obtained after the ethanol-thermal reactions at  $175^\circ\text{C}$  over 9 h and illustrating that the composites consist of B, N, Fe, and O. The Cu peaks are from the copper TEM grid.

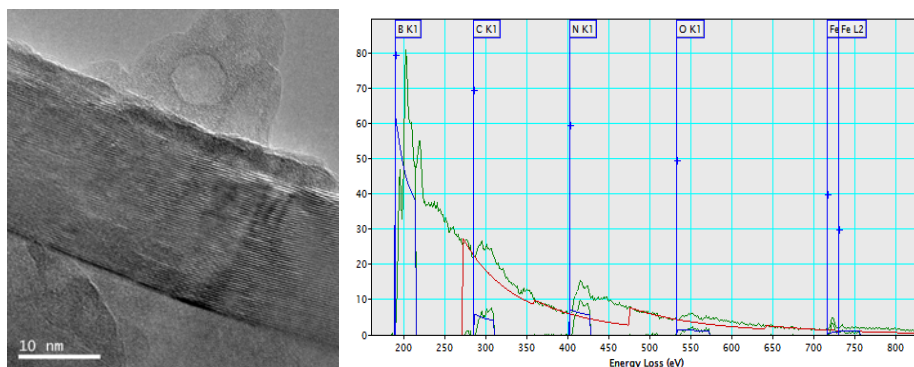

Figure S3. High-resolution TEM image showing the originally amorphous nature of the coating in a nanocomposite obtained after the ethanol-thermal reactions at 175 °C for 3.5 h. EEL spectrum indicating that the amorphous substance consists of Fe, O, and C.

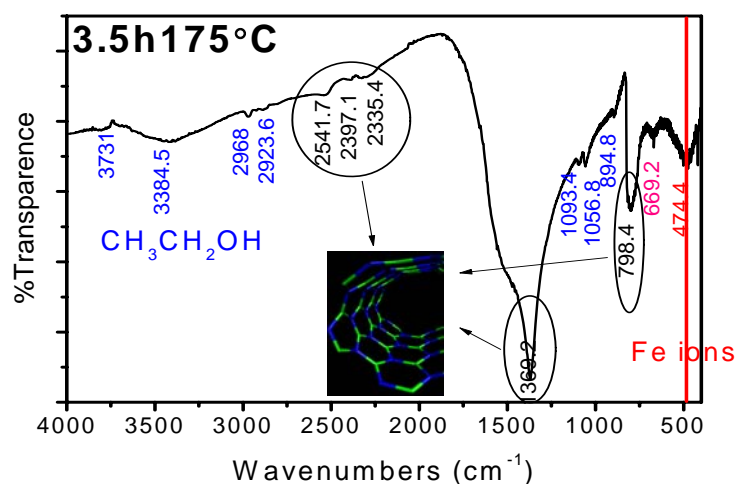

Figure S4. The FTIR spectrum of a nanocomposite obtained after the ethanol-thermal reactions at 175°C over 3.5 h showing the identified absorption peaks which can be divided into those peculiar to three groups: 1)  $\text{CH}_3\text{CH}_2\text{OH}$ , 2) BNNTs and 3)  $\text{Fe}^{3+}$  ions. The absence of the absorptions from the other functional groups and/or frameworks suggests that the association of  $\text{Fe}^{3+}$ ,  $\text{CH}_3\text{CH}_2\text{OH}$  and BNNTs is likely due to the coordination bonds.

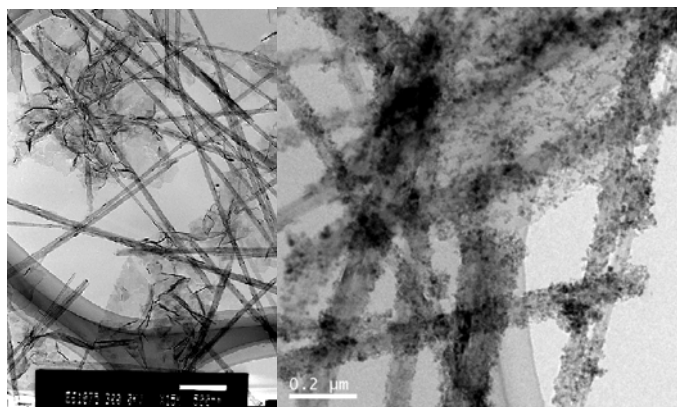

Figure S5. Being accompanied by the vigorous ultrasonic dispersion before coating, the BNNTs might be partially broken. This resulted in the BNNTs with shorter lengths ( $\sim 15 \mu\text{m}$ ) and some other BN layered structures (flake- or sheet-like). The BN fragments can also be coated/attached to the  $\text{Fe}_3\text{O}_4$  nanoparticles during the ethanol thermal reaction. Such phenomenon additionally suggests that the present coating of  $\text{Fe}_3\text{O}_4$  is not structure- or defect-related, but reflects the intrinsic nature of h-BN in the ethanol thermal conditions.

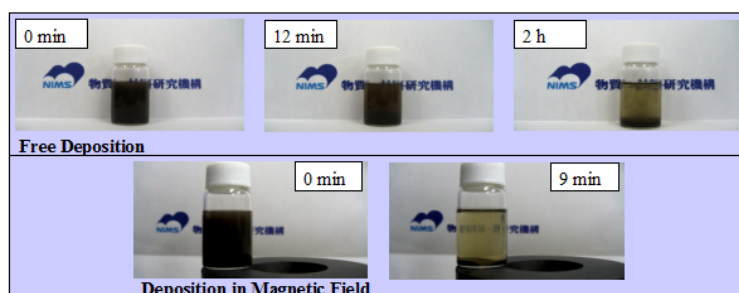

Figure S6. The natural deposition process of the  $\text{Fe}_3\text{O}_4/\text{BNNT}$  nanocomposites could also be drastically accelerated using a loudspeaker magnet (more than 20-fold). Normally, the deposition process takes more than 2 hours, while it speeds up in the presence of a loudspeaker magnet and only takes about 9 min. Considering a high surface to volume ratio of the ultra-fine  $\text{Fe}_3\text{O}_4$  nanoparticles, the behavior observed here guarantees that such nanocomposites have potential applications in cell separation and environment treatment.
